# Supplementary material for: Preliminary Evidence That Fiji Water Has Protective Effects against Aluminum Toxicity in Honey Bees (Apis mellifera)
Source: MDPI journal article supplement (doi:10.3390/insects14020211), 2023-02-20
Supplement: s1 [file s1]

**Table S1.** Pairwise comparisons with a Bonferroni correction for the ANCOVA utilizing the rhythmicity data by aluminum grouping.

| Treatment (mg/L) Pair<br>Group 1 | Group 2        | Significance between<br>groups | Group 1 comparison to<br>Group 2 |
|----------------------------------|----------------|--------------------------------|----------------------------------|
| <b>AlCl3 25mg/L groups</b>       |                |                                |                                  |
| AlCl3 25→Fiji                    | AlCl3 25→DI    | ***                            | Higher                           |
| AlCl3 25→Fiji                    | Fiji→AlCl3 25  | 1.000                          |                                  |
| AlCl3 25→Fiji                    | DI→AlCl3 25    | ***                            | Higher                           |
| AlCl3 25→DI                      | Fiji→AlCl3 25  | ***                            | Lower                            |
| AlCl3 25→DI                      | DI→AlCl3 25    | ***                            | Higher                           |
| Fiji→AlCl3 25                    | DI→AlCl3 25    | ***                            | Higher                           |
| <b>AlCl3 75mg/L groups</b>       |                |                                |                                  |
| AlCl3 75→Fiji                    | AlCl3 75→DI    | ***                            | Higher                           |
| AlCl3 75→Fiji                    | Fiji→AlCl3 75  | 1.000                          |                                  |
| AlCl3 75→Fiji                    | DI→AlCl3 75    | ***                            | Higher                           |
| AlCl3 75→DI                      | Fiji→AlCl3 75  | ***                            | Lower                            |
| AlCl3 75→DI                      | DI→AlCl3 75    | ***                            | Lower                            |
| Fiji→AlCl3 75                    | DI→AlCl3 75    | ***                            | Higher                           |
| <b>AlCl3 150mg/L groups</b>      |                |                                |                                  |
| AlCl3 150→Fiji                   | AlCl3 150→DI   | ***                            | Higher                           |
| AlCl3 150→Fiji                   | Fiji→AlCl3 150 | ***                            | Lower                            |
| AlCl3 150→Fiji                   | DI→AlCl3 150   | ***                            | Higher                           |
| AlCl3 150→DI                     | Fiji→AlCl3 150 | ***                            | Lower                            |
| AlCl3 150→DI                     | DI→AlCl3 150   | ***                            | Lower                            |
| Fiji→AlCl3 150                   | DI→AlCl3 150   | ***                            | Higher                           |
| <b>AlCl3 300mg/L groups</b>      |                |                                |                                  |
| AlCl3 300→Fiji                   | AlCl3 300→DI   | ***                            | Higher                           |
| AlCl3 300→Fiji                   | Fiji→AlCl3 300 | ***                            | Lower                            |
| AlCl3 300→Fiji                   | DI→AlCl3 300   | ***                            | Higher                           |
| AlCl3 300→DI                     | Fiji→AlCl3 300 | ***                            | Lower                            |
| AlCl3 300→DI                     | DI→AlCl3 300   | .020*                          | Lower                            |
| Fiji→AlCl3 300                   | DI→AlCl3 300   | ***                            | Higher                           |

Note. The means and standard deviations can be found in Table S2. Comparison with Group 2 information is only shown for groups with significant  $p$  values when compared to a control. Each group had a sample size of  $n = 32$ , so the combined sample size for each treatment pair was  $n = 62$ . \*  $p < 0.05$ , \*\*  $p < 0.001$ , and \*\*\*  $p < 0.0001$

**Table S2.** Significance table for experimental group rhythmicity data. Effects were compared to a zero baseline using one-sample *t*-tests.

| Treatment       |       | mg/L | M        | Sd      | df  | <i>t</i> -value | <i>p</i> -value | Effect |
|-----------------|-------|------|----------|---------|-----|-----------------|-----------------|--------|
| Fiji water 1    | Day   | 0    | 35.89    | 82.34   | 263 | 7.082           | ***             | Higher |
| Fiji water 2    |       | 0    | -190.38  | 778.39  | 351 | -4.589          | ***             | Lower  |
| DI Water→Fiji   |       | 0    | 34.00    | 88.51   | 351 | 7.207           | ***             | Higher |
| Fiji→DI water   |       | 0    | -23.72   | 69.78   | 351 | -6.377          | ***             | Lower  |
| AlCl3→Fiji      |       | 25   | -49.49   | 53.38   | 351 | -17.394         | ***             | Lower  |
| AlCl3→Fiji      |       | 75   | -.60     | 52.17   | 351 | -0.214          | 0.830           |        |
| AlCl3→Fiji      |       | 150  | 10.38    | 68.04   | 351 | 2.863           | 0.004**         | Higher |
| AlCl3→Fiji      |       | 300  | -91.52   | 34.45   | 351 | -49.847         | ***             | Lower  |
| Fiji→AlCl3      |       | 25   | -38.37   | 92.38   | 351 | -7.792          | ***             | Lower  |
| Fiji→AlCl3      |       | 75   | -10.77   | 46.33   | 351 | -4.360          | ***             | Lower  |
| Fiji→AlCl3      |       | 150  | 16.75    | 91.72   | 351 | 3.427           | 0.001**         | Higher |
| Fiji→AlCl3      |       | 300  | -17.46   | 49.34   | 351 | -6.640          | ***             | Lower  |
| AlCl3→DI water  |       | 25   | 44.18    | 1052.34 | 351 | 0.788           | 0.431           |        |
| AlCl3→DI water  |       | 75   | -1142.82 | 437.59  | 351 | -49.00          | ***             | Lower  |
| AlCl3→DI water  |       | 150  | -363.66  | 371.08  | 351 | -18.386         | ***             | Lower  |
| AlCl3→DI water  |       | 300  | -560.97  | 532.87  | 351 | -19.751         | ***             | Lower  |
| DI water→ AlCl3 |       | 25   | -685.60  | 699.60  | 351 | -18.386         | ***             | Lower  |
| DI water→ AlCl3 |       | 75   | -541.17  | 738.59  | 351 | -13.747         | ***             | Lower  |
| DI water→ AlCl3 |       | 150  | -157.43  | 456.14  | 351 | -6.475          | ***             | Lower  |
| DI water→ AlCl3 |       | 300  | -433.44  | 611.41  | 351 | -13.301         | ***             | Lower  |
| Fiji water 1    | Night | 0    | 11.99    | 51.66   | 312 | 4.105           | ***             | Higher |
| Fiji water 2    |       | 0    | -112.26  | 375.02  | 415 | -6.105          | ***             | Lower  |
| DI Water→Fiji   |       | 0    | 19.91    | 63.90   | 416 | 6.32            | ***             | Higher |
| Fiji→DI water   |       | 0    | -9.52    | 31.81   | 416 | -6.108          | ***             | Lower  |
| AlCl3→Fiji      |       | 25   | -14.67   | 37.19   | 416 | -8.053          | ***             | Lower  |
| AlCl3→Fiji      |       | 75   | 1.60     | 39.94   | 416 | 0.817           | 0.415           |        |
| AlCl3→Fiji      |       | 150  | 4.50     | 39.72   | 416 | 2.312           | 0.021*          | Higher |
| AlCl3→Fiji      |       | 300  | -35.84   | 23.93   | 416 | -30.585         | ***             | Lower  |
| Fiji→AlCl3      |       | 25   | -18.34   | 42.03   | 416 | -8.910          | ***             | Lower  |
| Fiji→AlCl3      |       | 75   | -12.22   | 25.87   | 416 | -9.647          | ***             | Lower  |
| Fiji→AlCl3      |       | 150  | 6.09     | 47.82   | 416 | 2.600           | 0.010*          | Higher |
| Fiji→AlCl3      |       | 300  | -6.68    | 32.70   | 416 | -4.173          | ***             | Lower  |
| AlCl3→DI water  |       | 25   | -23.36   | 522.61  | 415 | -0.911          | 0.363           |        |
| AlCl3→DI water  |       | 75   | -469.68  | 288.11  | 415 | -33.250         | ***             | Lower  |
| AlCl3→DI water  |       | 150  | -112.79  | 196.66  | 415 | -11.698         | ***             | Lower  |
| AlCl3→DI water  |       | 300  | -285.77  | 182.21  | 415 | -31.988         | ***             | Lower  |
| DI water→ AlCl3 |       | 25   | -324.66  | 384.15  | 415 | -17.238         | ***             | Lower  |
| DI water→ AlCl3 |       | 75   | -347.97  | 478.97  | 415 | -14.817         | ***             | Lower  |
| DI water→ AlCl3 |       | 150  | -9.98    | 334.37  | 415 | -0.609          | 0.543           |        |

Table S2. (continued).

| DI water→ AlCl3 |                       | 300 | -238.04 | 254.68 | 415 | -19.063 | ***   | Lower  |
|-----------------|-----------------------|-----|---------|--------|-----|---------|-------|--------|
| Fiji water 1    | Avg. 24hr<br>Activity | 0   | 22.92   | 68.43  | 576 | 8.046   | **    | Higher |
| Fiji water 2    |                       | 0   | -148.06 | 595.72 | 767 | -6.888  | **    | Lower  |
| DI Water→Fiji   |                       | 0   | 26.36   | 76.43  | 768 | 9.564   | **    | Higher |
| Fiji→DI water   |                       | 0   | -16.02  | 53.14  | 768 | -8.359  | **    | Higher |
| AlCl3→Fiji      |                       | 25  | -30.61  | 48.51  | 768 | -17.497 | **    | Lower  |
| AlCl3→Fiji      |                       | 75  | 0.59    | 45.93  | 768 | 0.358   | 0.720 |        |
| AlCl3→Fiji      |                       | 150 | 7.19    | 54.58  | 768 | 3.654   | **    | Higher |
| AlCl3→Fiji      |                       | 300 | -61.33  | 40.28  | 768 | -42.217 | **    | Lower  |
| Fiji→AlCl3      |                       | 25  | -27.51  | 70.41  | 768 | -10.834 | **    | Lower  |
| Fiji→AlCl3      |                       | 75  | -11.56  | 36.66  | 768 | -8.741  | **    | Lower  |
| Fiji→AlCl3      |                       | 150 | 10.97   | 71.49  | 768 | 4.255   | **    | Higher |
| Fiji→AlCl3      |                       | 300 | -11.62  | 41.48  | 768 | -7.766  | **    | Higher |
| AlCl3→DI water  |                       | 25  | 7.61    | 809.75 | 767 | 0.260   | 0.795 |        |
| AlCl3→DI water  |                       | 75  | -778.20 | 495.16 | 767 | -43.554 | ***   | Lower  |
| AlCl3→DI water  |                       | 150 | -227.77 | 315.57 | 767 | -20.002 | ***   | Lower  |
| AlCl3→DI water  |                       | 300 | -411.91 | 408.33 | 767 | -27.956 | ***   | Lower  |
| DI water→ AlCl3 |                       | 25  | -490.09 | 579.84 | 767 | -23.423 | ***   | Lower  |
| DI water→ AlCl3 |                       | 75  | -436.52 | 618.91 | 767 | -19.546 | ***   | Lower  |
| DI water→ AlCl3 |                       | 150 | -77.56  | 401.39 | 767 | -5.355  | ***   | Lower  |
| DI water→ AlCl3 |                       | 300 | -327.60 | 464.39 | 767 | -19.550 | ***   | Lower  |

Note: Combined DI ( $n = 218$ ): Day ( $M = 569.42$ ,  $SD = 843.32$ ), Night ( $M = 225.68$ ,  $SD = 414.72$ ), Avg. 24 hr Activity ( $M = 383.12$ ,  $SD = 669.48$ ). The  $n$  for all AlCl3 before and after DI, AlCl3 before and after Fiji water, and Fiji 2 is 32. The  $n$  for Fiji water 2 is 24. \*  $p < 0.05$ , \*\*  $p < 0.01$ , and \*\*\*  $p < 0.001$

**Table S3.** Significance table for one-sample *t*-tests comparing aluminum groupings average daily activity to a zero baseline.

| Treatment<br>(mg/L) | N data<br>points | M       | SD      | <i>t</i> | df   | <i>p</i> | Lower 95%<br>CI | Upper 95%<br>CI |
|---------------------|------------------|---------|---------|----------|------|----------|-----------------|-----------------|
| Fiji water 1        | 214              | 2394.35 | 3324.58 | 10.540   | 213  | ***      | 1946.38         | 2842.32         |
| Fiji water 2        | 960              | -109.16 | 832.27  | -4.064   | 959  | ***      | -161.87         | -56.45          |
| DI Water→Fiji       | 395              | 1715.21 | 3229.45 | 10.556   | 394  | ***      | 1395.75         | 2034.67         |
| Fiji→DI water       | 184              | 1504.34 | 2629.70 | 7.760    | 183  | ***      | 1121.85         | 1886.84         |
| AlCl3 25→Fiji       | 331              | 643.08  | 2212.24 | 5.289    | 330  | ***      | 403.88          | 882.28          |
| AlCl3 75→Fiji       | 208              | 1532.74 | 2707.88 | 8.163    | 207  | ***      | 1162.58         | 1902.91         |
| AlCl3 150→Fiji      | 200              | 1958.36 | 3068.83 | 9.025    | 199  | ***      | 1530.44         | 2386.27         |
| AlCl3 300→Fiji      | 157              | 248.77  | 1550.81 | 2.010    | 156  | .046*    | 4.289           | 493.24          |
| Fiji→AlCl3 25       | 287              | 1022.76 | 2546.14 | 6.805    | 268  | ***      | 726.93          | 1318.58         |
| Fiji→AlCl 3 75      | 255              | 801.10  | 2051.49 | 6.236    | 254  | ***      | 548.10          | 1054.10         |
| Fiji→AlCl3 150      | 305              | 1592.61 | 3151.64 | 8.825    | 304  | ***      | 1237.49         | 1947.72         |
| Fiji→AlCl3 300      | 254              | 752.48  | 2037.25 | 5.887    | 253  | ***      | 500.74          | 1004.23         |
| AlCl3 25: DI        | 799              | 18.34   | 1116.22 | 0.464    | 798  | 0.642    | -59.17          | 95.86           |
| AlCl3 75: DI        | 768              | -718.89 | 740.99  | -26.886  | 767  | ***      | -771.38         | -666.40         |
| AlCl3 150: DI       | 576              | -338.41 | 813.07  | -9.99    | 575  | ***      | -404.95         | -271.87         |
| AlCl3 300: DI       | 576              | -595.04 | 809.19  | -17.648  | 575  | ***      | -661.26         | -528.82         |
| DI: AlCl3 25        | 864              | -443.90 | 921.70  | -14.156  | 863  | ***      | -505.44         | -382.35         |
| DI: AlCl3 75        | 1024             | -872.82 | 3402.04 | -8.210   | 1023 | ***      | -1081.45        | -664.21         |
| DI: AlCl3 150       | 832              | -214.79 | 791.79  | -7.825   | 831  | ***      | -268.67         | -160.91         |
| DI: AlCl3 300       | 832              | -371.71 | 784.12  | -13.674  | 831  | ***      | -425.07         | -318.36         |

Note: *N*=1 monitors for each concentration. *N* data points is the number of crossings. The DI control group ( *N* = 218) had 9 monitors (one for each data collection period) and are not included due to the zero baseline representing the controls. The *N* for all AlCl3 before and after DI, AlCl3 before and after Fiji water, and Fiji 2 is 32. \* *p* < 0.05, \*\* *p* < 0.01, \*\*\* *p* < 0.001.

**Table S4.** Pairwise comparisons with a Bonferroni correction for the average daily activity ANCOVA by aluminum concentration.

| Treatment(mg/L) Pair        |                | Significance   | Group 1 comparison to |
|-----------------------------|----------------|----------------|-----------------------|
| Group 1                     | Group 2        | between groups | Group 2               |
| <b>AlCl3 25mg/L groups</b>  |                |                |                       |
| AlCl3 25→Fiji               | AlCl3 25→DI    | 1.000          |                       |
| AlCl3 25→Fiji               | Fiji→AlCl3 25  | 1.000          |                       |
| AlCl3 25→Fiji               | DI→AlCl3 25    | 0.120          |                       |
| AlCl3 25→DI                 | Fiji→AlCl3 25  | 0.922          |                       |
| AlCl3 25→DI                 | DI→AlCl3 25    | 0.005*         | Higher                |
| Fiji→AlCl3 25               | DI→AlCl3 25    | ****           | Higher                |
| <b>AlCl3 75mg/L groups</b>  |                |                |                       |
| AlCl3 75→Fiji               | AlCl3 75→DI    | ****           | Higher                |
| AlCl3 75→Fiji               | Fiji→AlCl3 75  | ****           | Higher                |
| AlCl3 75→Fiji               | DI→AlCl3 75    | ****           | Higher                |
| AlCl3 75→DI                 | Fiji→AlCl3 75  | ****           | Lower                 |
| AlCl3 75→DI                 | DI→AlCl3 75    | .1.00          |                       |
| Fiji→AlCl3 75               | DI→AlCl3 75    | ****           | Higher                |
| <b>AlCl3 150mg/L groups</b> |                |                |                       |
| AlCl3 150→Fiji              | AlCl3 150→DI   | ****           | Higher                |
| AlCl3 150→Fiji              | Fiji→AlCl3 150 | 1.00           |                       |
| AlCl3 150→Fiji              | DI→AlCl3 150   | ****           | Higher                |
| AlCl3 150→DI                | Fiji→AlCl3 150 | ****           | Lower                 |
| AlCl3 150→DI                | DI→AlCl3 150   | 1.00           |                       |
| Fiji→AlCl3 150              | DI→AlCl3 150   | ****           | Higher                |
| <b>AlCl3 300mg/L groups</b> |                |                |                       |
| AlCl3 300→Fiji              | AlCl3 300→DI   | 1.000          |                       |
| AlCl3 300→Fiji              | Fiji→AlCl3 300 | 1.00           |                       |
| AlCl3 300→Fiji              | DI→AlCl3 300   | 1.00           |                       |
| AlCl3 300→DI                | Fiji→AlCl3 300 | ****           | Lower                 |
| AlCl3 300→DI                | DI→AlCl3 300   | 1.000          |                       |
| Fiji→AlCl3 300              | DI→AlCl3 300   | 0.080          |                       |

Note: Group 1 and Group 2 are compared against each other in the respective analysis. Comparison with Group 2 information is only shown for groups with significant *p* values when compared to Group 2. The *n* for all AlCl3 before and after DI, AlCl3 before and after Fiji water, and Fiji 2 is 32. \* *p* < 0.05, \*\* *p* < 0.01, \*\*\* *p* < 0.001, and \*\*\*\* *p* < 0.0001.

**Table S5.** Combined Mortality Data ANCOVA comparisons.

| <b>Treatment<br/>(mg/L)</b> | <b><i>n</i></b> | <b><i>M</i></b> | <b><i>SD</i></b> | <b><i>SE</i></b> | <b><i>p</i></b> | <b><i>Average Numbers of Days Alive<br/>Compared with respective control</i></b> |
|-----------------------------|-----------------|-----------------|------------------|------------------|-----------------|----------------------------------------------------------------------------------|
| Fiji water 1                | 24              | 8.92            | 3.67             | 0.75             | .010*           | Higher                                                                           |
| Fiji water 2                | 32              | 8.52            | 3.05             | 0.54             | .107            |                                                                                  |
| DI Water: Fiji              | 32              | 12.34           | 2.36             | 0.42             | ***             | Higher                                                                           |
| Fiji: DI water              | 32              | 5.72            | 3.30             | 0.58             | ***             | Lower                                                                            |
| AlCl3(25): Fiji             | 32              | 10.34           | 3.39             | 0.60             | .996            |                                                                                  |
| AlCl3(75): Fiji             | 32              | 6.50            | 3.20             | 0.57             | .959            |                                                                                  |
| AlCl3(150): Fiji            | 32              | 6.28            | 3.18             | 0.56             | .193            |                                                                                  |
| AlCl3(300): Fiji            | 32              | 4.97            | 1.77             | 0.31             | ***             | Higher                                                                           |
| Fiji: AlCl3(25)             | 32              | 8.97            | 4.10             | 0.73             | .960            |                                                                                  |
| Fiji: AlCl3(75)             | 32              | 7.50            | 4.32             | 0.76             | .418            |                                                                                  |
| Fiji: AlCl3(150)            | 32              | 9.53            | 3.92             | 0.69             | .945            |                                                                                  |
| Fiji: AlCl3(300)            | 32              | 7.94            | 2.36             | 0.42             | .021*           | Lower                                                                            |
| AlCl3(25): DI               | 32              | 7.13            | 3.51             | 0.60             | .004*           | Lower                                                                            |
| AlCl3(75): DI               | 32              | 5.53            | 3.41             | 0.29             | .001*           | Lower                                                                            |
| AlCl3(150): DI              | 32              | 4.25            | 3.60             | 0.630            | .002*           | Lower                                                                            |
| AlCl3(300): DI              | 32              | 4.88            | 1.67             | 0.88             | ***             | Lower                                                                            |
| DI: AlCl3(25)               | 32              | 7.91            | 2.01             | 0.62             | .357            |                                                                                  |
| DI: AlCl3(75)+              | 32              | 7.63            | 1.50             | 0.64             | ***             | Lower                                                                            |
| DI: AlCl3(150)              | 32              | 6.19            | 1.59             | 0.67             | .870            |                                                                                  |
| DI: AlCl3(300)              | 32              | 4.88            | 1.16             | 0.90             | .014*           | Lower                                                                            |

Note. Comparison is shown based on mean number of days alive. An independent samples *t*-test was run for one group as indicated by the + due to the number of groups. The *n* for all AlCl3 before and after DI, AlCl3 before and after Fiji water, and Fiji 2 is 32. \*  $p < 0.05$ , \*\*  $p < 0.01$ , \*\*\*  $p < 0.001$ .

**Table S6.** Pairwise comparisons with a Bonferroni correction for the ANCOVA for the number of days alive by aluminum concentration.

| Treatment(mg/L) Pair |                | Significance   | Group 1 comparison to |
|----------------------|----------------|----------------|-----------------------|
| Group 1              | Group 2        | between groups | Group 2               |
| ALCL3 25mg/L groups  |                |                |                       |
| AlCl3 25→Fiji        | AlCl3 25→DI    | 0.001**        | Higher                |
| AlCl3 25→Fiji        | Fiji→AlCl3 25  | 1.00           |                       |
| AlCl3 25→Fiji        | DI→AlCl3 25    | 0.421          |                       |
| AlCl3 25→DI          | Fiji→AlCl3 25  | 0.284          |                       |
| AlCl3 25→DI          | DI→AlCl3 25    | 1.000          |                       |
| Fiji→AlCl3 25        | DI→AlCl3 25    | 1.000          |                       |
| ALCL3 75mg/L groups  |                |                |                       |
| AlCl3 75→Fiji        | AlCl3 75→DI    | 1.000          |                       |
| AlCl3 75→Fiji        | Fiji→AlCl3 75  | 1.000          |                       |
| AlCl3 75→Fiji        | DI→AlCl3 75    | 1.000          |                       |
| AlCl3 75→DI          | Fiji→AlCl3 75  | 0.698          |                       |
| AlCl3 75→DI          | DI→AlCl3 75    | 1.000          |                       |
| Fiji→AlCl3 75        | DI→AlCl3 75    | 1.000          |                       |
| ALCL3 150mg/L groups |                |                |                       |
| AlCl3 150→Fiji       | AlCl3 150→DI   | 0.234          | Lower                 |
| AlCl3 150→Fiji       | Fiji→AlCl3 150 | 0.324          |                       |
| AlCl3 150→Fiji       | DI→AlCl3 150   | 1.00           |                       |
| AlCl3 150→DI         | Fiji→AlCl3 150 | ****           |                       |
| AlCl3 150→DI         | DI→AlCl3 150   | 1.000          |                       |
| Fiji→AlCl3 150       | DI→AlCl3 150   | 0.011*         |                       |
| ALCL3 300mg/L groups |                |                |                       |
| AlCl3 300→Fiji       | AlCl3 300→DI   | 1.000          | Lower                 |
| AlCl3 300→Fiji       | Fiji→AlCl3 300 | 0.192          |                       |
| AlCl3 300→Fiji       | DI→AlCl3 300   | 1.000          |                       |
| AlCl3 300→DI         | Fiji→AlCl3 300 | 0.008**        |                       |
| AlCl3 300→DI         | DI→AlCl3 300   | 1.000          |                       |
| Fiji→AlCl3 300       | DI→AlCl3 300   | 1.000          |                       |

Note: Group 1 and Group 2 are compared against each other in the respective analysis. Comparison with Group 2 information is only shown for groups with significant  $p$  values when compared to Group 2. The  $n$  for all groups is 32 bees. \*  $p < 0.05$ , \*\*  $p < 0.01$ , \*\*\*  $p < 0.001$ , and \*\*\*\*  $p < 0.0001$

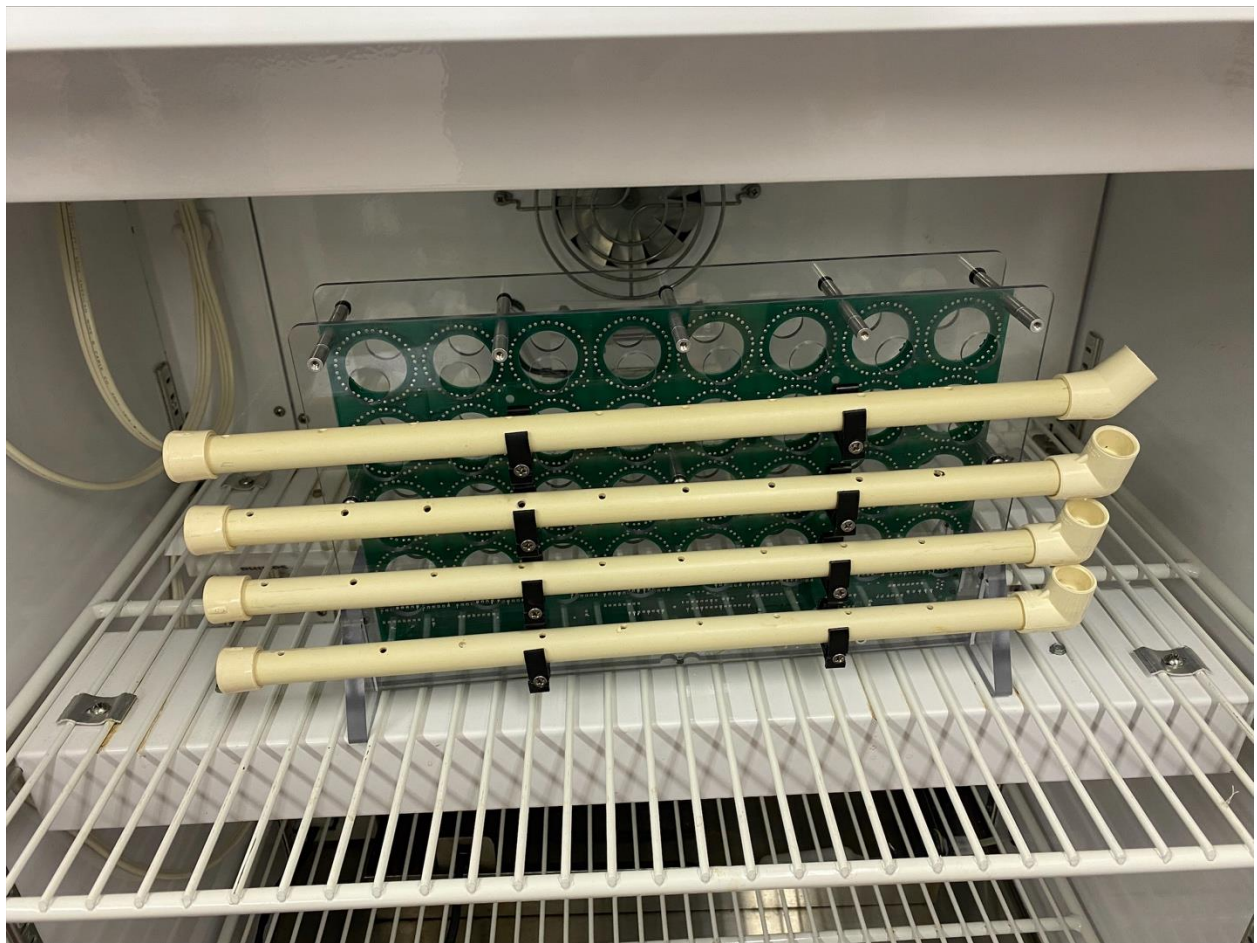

**Figure S1:** Monitor apparatus with pipes



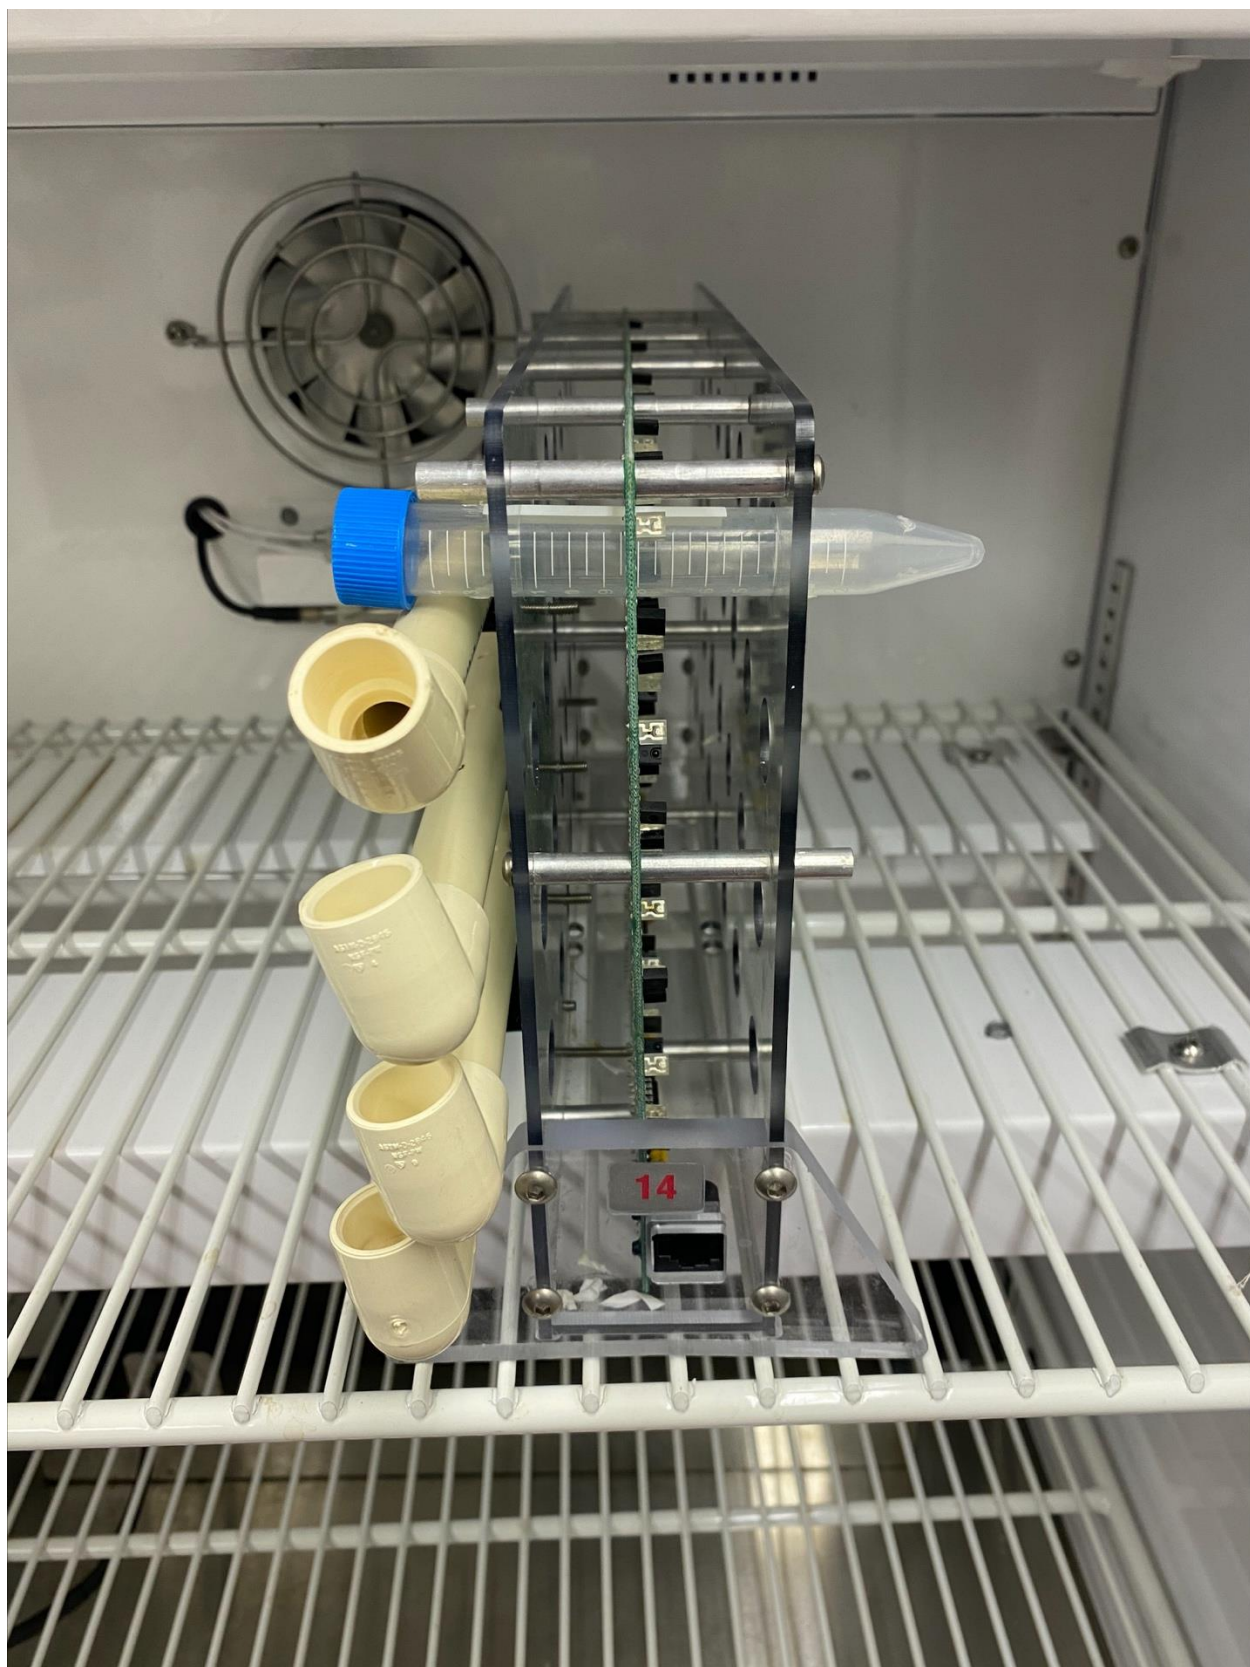

**Figure S2:** Side view of monitor apparatus with tube to show centerline.
